# Supplementary material for: Different patient-reported outcomes in immigrants and patients born in Sweden: 18,791 patients with 1 year of follow-up in the Swedish Hip Arthroplasty Register
Source: PubMed Central journal article supplement — Acta Orthop. 2014 Jun 16;85(3):221–8. doi: 10.3109/17453674.2014.919556 (PMC4062786; doi:10.3109/17453674.2014.919556), 2014-06-16
Supplement: ORT-85-221-s6359.pdf [file ORT-85-221-s6359.pdf]

## Supplementary article data

# Different patient-reported outcomes in immigrants and patients born in Sweden

18,791 patients with 1 year of follow-up in the Swedish Hip Arthroplasty Register

Ferid Krupic<sup>1,3</sup>, Göran Garellick<sup>1,3</sup>, Max Gordon<sup>2</sup>, and Johan Kärrholm<sup>1,3</sup>

<sup>1</sup>Department of Orthopaedics, Institute of Clinical Sciences, Sahlgrenska Academy, University of Gothenburg; <sup>2</sup>Department of Clinical Sciences at Danderyd Hospital, Karolinska Institutet, Stockholm; <sup>3</sup>The Swedish Hip Arthroplasty Register, Registercentrum VGR, Gothenburg, Sweden.  
Correspondence: ferid.krupic@vgregion.se  
Submitted 13-04-03. Accepted 14-03-02

Table 2. Preoperative distribution of patients with no or moderate-to-severe severe problems in the 5 EQ-5D dimensions

| Preoperatively, n (%)                                                                                                            | Sweden      | Nordic Countries <sup>a</sup> | Europe <sup>b</sup> | Outside Europe <sup>c</sup> | Chi-square |
|----------------------------------------------------------------------------------------------------------------------------------|-------------|-------------------------------|---------------------|-----------------------------|------------|
| <b>Mobility</b>                                                                                                                  |             |                               |                     |                             |            |
| No problems                                                                                                                      | 1,108 (6)   | 51 (6)                        | 22 (4)              | 5 (5)                       | 0.2        |
| Moderate-severe problems                                                                                                         | 16,232 (94) | 678 (94)                      | 501 (96)            | 104 (95)                    |            |
| <b>Self-care</b>                                                                                                                 |             |                               |                     |                             |            |
| No problems                                                                                                                      | 12,987 (75) | 571 (69)                      | 341 (65)            | 67 (62)                     | <0.001     |
| Moderate-severe problems                                                                                                         | 4,353 (25)  | 248 (31)                      | 182 (35)            | 42 (38)                     |            |
| <b>Usual activities</b>                                                                                                          |             |                               |                     |                             |            |
| No problems                                                                                                                      | 6,328 (36)  | 265 (32)                      | 162 (31)            | 29 (27)                     | 0.001      |
| Moderate-severe problems                                                                                                         | 11,012 (64) | 554 (68)                      | 381 (69)            | 80 (73)                     |            |
| <b>Pain/Discomfort</b>                                                                                                           |             |                               |                     |                             |            |
| No problems                                                                                                                      | 173 (1)     | 8 (1)                         | 6 (1)               | 7 (6)                       | <0.001     |
| Moderate-severe problems                                                                                                         | 17,167 (99) | 811 (99)                      | 517 (99)            | 102 (94)                    |            |
| <b>Anxiety/Depression</b>                                                                                                        |             |                               |                     |                             |            |
| No problems                                                                                                                      | 9,960 (57)  | 431 (53)                      | 217 (42)            | 39 (36)                     | <0.001     |
| Moderate-severe problems                                                                                                         | 7,380 (43)  | 388 (47)                      | 306 (58)            | 70 (64)                     |            |
| <sup>a</sup> Excluding Sweden.<br><sup>b</sup> Excluding previous Soviet Union.<br><sup>c</sup> Including previous Soviet Union. |             |                               |                     |                             |            |

Table 3. Postoperative distribution of patients with no or moderate-to-severe problems in the 5 EQ-5D dimensions

| 1 year postoperatively, n (%) | Sweden      | Nordic Countries <sup>a</sup> | Europe <sup>b</sup> | Outside Europe <sup>c</sup> | Chi-square |
|-------------------------------|-------------|-------------------------------|---------------------|-----------------------------|------------|
| <b>Mobility</b>               |             |                               |                     |                             |            |
| No problems                   | 10,285 (59) | 422 (52)                      | 263 (50)            | 51 (47)                     | <0.001     |
| Moderate/severe problems      | 7,055 (41)  | 397 (48)                      | 260 (50)            | 58 (53)                     |            |
| <b>Self-care</b>              |             |                               |                     |                             |            |
| No problems                   | 15,790 (91) | 714 (87)                      | 423 (81)            | 83 (76)                     | <0.001     |
| Moderate/severe problems      | 1,550 (9)   | 105 (13)                      | 100 (19)            | 26 (24)                     |            |
| <b>Usual activities</b>       |             |                               |                     |                             |            |
| No problems                   | 12,965 (75) | 564 (69)                      | 330 (63)            | 65 (60)                     | <0.001     |
| Moderate/severe problems      | 4,375 (25)  | 255 (31)                      | 193 (37)            | 44 (40)                     |            |
| <b>Pain/Discomfort</b>        |             |                               |                     |                             |            |
| No problems                   | 7,311 (42)  | 299 (37)                      | 181 (35)            | 33 (30)                     | <0.001     |
| Moderate/severe problems      | 10,029 (58) | 520 (63)                      | 342 (65)            | 76 (70)                     |            |
| <b>Anxiety/Depression</b>     |             |                               |                     |                             |            |
| No problems                   | 13,471 (78) | 601 (73)                      | 326 (62)            | 61 (56)                     | <0.001     |
| Moderate/severe problems      | 3,869 (22)  | 218 (27)                      | 197 (38)            | 48 (44)                     |            |

<sup>a</sup> Excluding Sweden.  
<sup>b</sup> Excluding previous Soviet Union.  
<sup>c</sup> Including previous Soviet Union. Excluding Sweden.

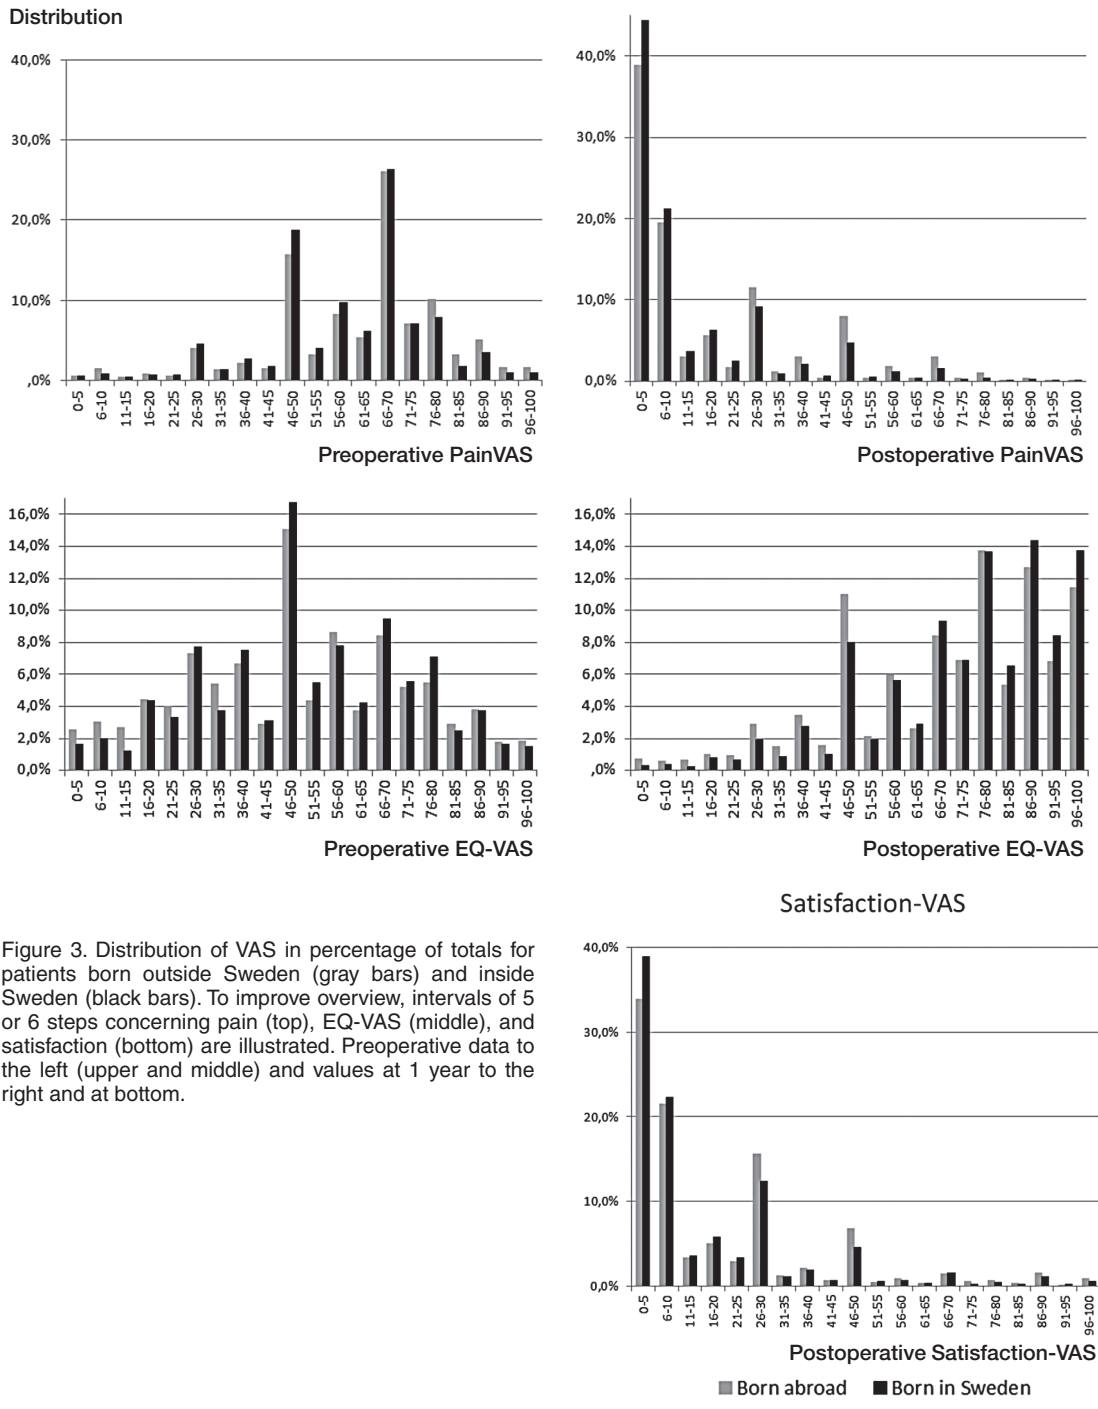

Figure 3. Distribution of VAS in percentage of totals for patients born outside Sweden (gray bars) and inside Sweden (black bars). To improve overview, intervals of 5 or 6 steps concerning pain (top), EQ-VAS (middle), and satisfaction (bottom) are illustrated. Preoperative data to the left (upper and middle) and values at 1 year to the right and at bottom.
